# Supplementary material for: Personal Carbon Budgets: A Pestle Review
Source: MDPI journal article supplement (doi:10.3390/su14159238), 2022-07-28
Supplement: s1 [file s1]

Archive with 1 entries (1 files):
- sustainability-1826940-supplementary.pdf
