# Supplementary material for: Personal Carbon Budgets: A Pestle Review
Source: MDPI journal article supplement (doi:10.3390/su14159238), 2022-07-28
Supplement: s1 [file s1 › sustainability-1826940-supplementary.pdf]

## Supplementary Materials Part S1

### FACTOR QUESTIONS

#### POLITICAL CRITERIA

- i) How does it fit with existing policy?
- ii) Feasibility of implementation
- iii) Burden on government – would it require new governing bodies established
- iv) Popularity with public – would political parties be hesitant to enact policy due to implications for electability
- v) Would it require government funding?

#### ECONOMIC CRITERIA

- i) Is the model regressive or progressive (if applicable)?
- ii) Would it incur costs on industry or public?
- iii) Would it impact natural capital?
- iv) Would it impact growth/ GDP?
- v) Would it generate jobs?

#### SOCIAL CRITERIA

- i) Social justice implications
- ii) Potential changes to lifestyle

#### TECHNOLOGICAL CRITERIA

- i) Would new technology/ software need to be developed to facilitate this policy?
- ii) Would this policy encourage the development of 'green' technology?
- iii) Would this policy hinder technological development?

#### LEGAL CRITERIA

- i) How would this policy be enforced?
- ii) Mandatory or voluntary
- iii) Potential penalties
- iv) Implications for changes to law

#### ENVIRONMENTAL CRITERIA

- I) Emissions cap or no cap?
- II) Carbon footprinting requirement/ scope
- III) Would this policy encourage environmental awareness?

Table S1. PESTLE analysis of a PCT model according to criteria defined in Supplementary Materials

|                      |                                                                                                                                                                                                                                                                                                                                                                                                                                                                                                                                      |
|----------------------|--------------------------------------------------------------------------------------------------------------------------------------------------------------------------------------------------------------------------------------------------------------------------------------------------------------------------------------------------------------------------------------------------------------------------------------------------------------------------------------------------------------------------------------|
| <b>Political</b>     | <ul style="list-style-type: none"> <li>- Could fit in with existing ETS schemes</li> <li>- Would require significant money and manpower to implement</li> <li>- Would require governing body to oversee</li> <li>- May be unpopular due to limitations on public</li> <li>- Funded by government, projected to potentially cost between £700 million - £2 billion to set up (according to 2008 projection) and require running costs from government (Lane et al., 2008)</li> </ul>                                                  |
| <b>Economic</b>      | <ul style="list-style-type: none"> <li>- Incurs costs on businesses etc to have carbon footprints for goods/ services conducted and maintained</li> <li>- Job generation – within government body and carbon footprinting organisations</li> <li>- Limits amount of goods and services public will purchase due to limits on carbon they can ‘spend’</li> <li>- Progressive policy - [1]</li> </ul>                                                                                                                                  |
| <b>Social</b>        | <ul style="list-style-type: none"> <li>- Trading allows wealthy individuals to pay to keep their current lifestyle, poorer individuals may feel pressure to sell credits to gain additional income</li> <li>- Trading would allow for flexibility of lifestyle</li> <li>- Educates the public on their carbon spending and carbon cost of lifestyle</li> <li>- Individuals may try to ‘cheat’ the system to gain more credits/ incentives [2]</li> </ul>                                                                             |
| <b>Technological</b> | <ul style="list-style-type: none"> <li>- Could require adaptation of existing banking systems or require new systems to be created to track carbon credits [3]</li> <li>- Would need the creation of online credit marketplace or brokers</li> <li>- Carbon credit cards would require contactless machines to spend credits</li> <li>- Items may need barcodes or tags that have carbon credit cost</li> <li>- May encourage development of ‘greener’ technology</li> <li>- Unlikely to hinder technological development</li> </ul> |
| <b>Legal</b>         | <ul style="list-style-type: none"> <li>- Mandatory</li> <li>- New regulations on carbon emitting and carbon spending</li> <li>- Regulation and definition of carbon footprint must be set and adhered to for parity across all goods and services</li> <li>- Some form of penalty for non-compliance</li> </ul>                                                                                                                                                                                                                      |
| <b>Environmental</b> | <ul style="list-style-type: none"> <li>- Hard cap on emissions possible so emission reduction can be controlled</li> <li>- Requires carbon footprinting (or similar) for goods and services, method of CF will impact reductions</li> <li>- Scope of included goods and services flexible – some models only include household heating/ energy and transport [4]</li> <li>- Trading would allow all yearly surplus to be used – therefore cap would always be met rather than aiming to not meet the cap</li> </ul>                  |

Table S2 PESTLE analysis of PCA model according to criteria defined in Supplementary Materials Part S1

|                      |                                                                                                                                                                                                                                                                                                                                                                                                                                                                                                                   |
|----------------------|-------------------------------------------------------------------------------------------------------------------------------------------------------------------------------------------------------------------------------------------------------------------------------------------------------------------------------------------------------------------------------------------------------------------------------------------------------------------------------------------------------------------|
| <b>Political</b>     | <ul style="list-style-type: none"> <li>- Could fit in with existing ETS schemes</li> <li>- Government funded</li> <li>- Would require governing body to oversee</li> <li>- May be unpopular due to limitations on public – even more limitations than PCT</li> <li>- Funded by government, projected to potentially cost similar to predicted PCT models between £700 million - £2 billion to set up (according to 2008 projection) and require running costs from government</li> </ul>                          |
| <b>Economic</b>      | <ul style="list-style-type: none"> <li>- Incurs costs on businesses etc to have carbon footprints for goods/ services conducted and maintained</li> <li>- Job generation – within governmental body and carbon footprinting organisations</li> <li>- Limits amount of goods and services public will purchase due to limits on carbon they can ‘spend’</li> <li>- Limits amount of goods and services public will purchase due to limits on carbon they can ‘spend’ this could have some impact on GDP</li> </ul> |
| <b>Social</b>        | <ul style="list-style-type: none"> <li>- Public’s activity heavily limited by carbon budget, cannot buy credits to continue existing lifestyle if carbon intensive.</li> <li>- People with higher income cannot buy further credits to maintain current lifestyle</li> <li>- No trading means lower income/ vulnerable peoples cannot be exploited by those with greater wealth to gain carbon credits.</li> <li>- Progressive policy - [1]</li> </ul>                                                            |
| <b>Technological</b> | <ul style="list-style-type: none"> <li>- Could require adaptation of existing banking systems or require new systems to be created to track carbon credits [3]</li> <li>- Carbon credit cards would require contactless machines to spend credits</li> <li>- Items may need barcodes or tags that have carbon credit cost</li> <li>- May encourage development of ‘greener’ technology</li> <li>- Unlikely to hinder technological development</li> </ul>                                                         |
| <b>Legal</b>         | <ul style="list-style-type: none"> <li>- Mandatory</li> <li>- New regulations on carbon emitting and carbon spending</li> <li>- Regulation and definition of carbon footprint must be set and adhered to for parity across all goods and services</li> <li>- Some form of penalty for non-compliance</li> </ul>                                                                                                                                                                                                   |

---

**Environmental**

- Hard cap on emissions possible so emission reduction can be controlled
  - Requires carbon footprinting (or similar) for goods and services, method of CF will impact reductions
  - Scope of included goods and services flexible – some models only include household heating/ energy and transport [4]
  - Surplus not used each year – could roll over but more likely any surplus would be unused and therefore possibility emissions could stay below cap
-

Table S3 PESTLE analysis of carbon labelling model according to criteria defined in Supplementary Materials Part S1

|                      |                                                                                                                                                                                                                                                                                                                                                                                |
|----------------------|--------------------------------------------------------------------------------------------------------------------------------------------------------------------------------------------------------------------------------------------------------------------------------------------------------------------------------------------------------------------------------|
| <b>Political</b>     | <ul style="list-style-type: none"> <li>- Does not require a new government body in order to regulate it</li> <li>- Burden to carbon footprint can be on producers rather than government</li> <li>- 'Nudge' rather than policy</li> </ul>                                                                                                                                      |
| <b>Economic</b>      | <ul style="list-style-type: none"> <li>- Low cost to government</li> <li>- Incurs costs on businesses etc to have carbon footprints for goods/ services conducted and maintained</li> <li>- Job generation –within carbon footprinting organisations</li> </ul>                                                                                                                |
| <b>Social</b>        | <ul style="list-style-type: none"> <li>- Reliant on public changing own behaviour due to raised awareness</li> <li>- Nudge principles</li> <li>- Allows people to make their own choices</li> <li>- Raises awareness of carbon emission costs of products and services</li> </ul>                                                                                              |
| <b>Technological</b> | <ul style="list-style-type: none"> <li>- Carbon labelling would not require additional technology in terms of additional barcodes/ accounts for goods and services</li> <li>- Unlikely to hinder technological development</li> </ul>                                                                                                                                          |
| <b>Legal</b>         | <ul style="list-style-type: none"> <li>- Voluntary for the public not for businesses – still enforcement needed</li> <li>- Regulation and definition of carbon footprint must be set and adhered to for parity across all goods and services</li> </ul>                                                                                                                        |
| <b>Environmental</b> | <ul style="list-style-type: none"> <li>- Does not have hard cap, only can encourage public to be more environmentally aware rather than clear cuts in emissions</li> <li>- Minimal changes in behaviour so likely minimal changes in emissions [5]</li> <li>- Requires carbon footprinting (or similar) for goods and services, method of CF will impact reductions</li> </ul> |

Table S4 PESTLE analysis of carbon tax model according to criteria defined in Supplementary

|                      |                                                                                                                                                                                                                                                                                                                                                                                   |
|----------------------|-----------------------------------------------------------------------------------------------------------------------------------------------------------------------------------------------------------------------------------------------------------------------------------------------------------------------------------------------------------------------------------|
| <b>Political</b>     | <ul style="list-style-type: none"> <li>- Fits in with existing policies – due to being tax</li> <li>- Technically easy to implement</li> <li>- Has direct impact on public which may be unpopular</li> <li>- Would not require a specific new governing body to oversee it</li> <li>- Would generate revenue may be some implementation and monitoring costs</li> </ul>           |
| <b>Economic</b>      | <ul style="list-style-type: none"> <li>- Regressive tax – lower income households would spend proportionally more of their income on tax than higher income households [6]</li> <li>- Costs on industry and public</li> <li>- Unlikely to significantly impact growth as no cap</li> <li>- Unlikely to generate jobs</li> </ul>                                                   |
| <b>Social</b>        | <ul style="list-style-type: none"> <li>- Consumers would likely carry on ‘as usual’ and absorb the cost to an extent as they have with heavily taxed products like alcohol [7]</li> <li>- May widen social income divide due to nature of regressive taxes</li> <li>- Often an upstream tax so public would have little awareness of carbon weight per good or service</li> </ul> |
| <b>Technological</b> | <ul style="list-style-type: none"> <li>- Does not require massive technological changes to current systems or ways of life</li> <li>- May encourage businesses to use more efficient technology that does not incur carbon taxation</li> <li>- May inspire technological development of less polluting technology</li> </ul>                                                      |
| <b>Legal</b>         | <ul style="list-style-type: none"> <li>- Mandatory</li> <li>- Could incur legal penalties if avoided</li> <li>- Could be vulnerable to fraud and therefore legal pursuit</li> <li>- Change in taxation policy</li> </ul>                                                                                                                                                          |
| <b>Environmental</b> | <ul style="list-style-type: none"> <li>- Could encourage reduction of carbon emissions</li> <li>- No hard cap on emissions so level of emissions reduced cannot be controlled</li> <li>- Often upstream so would be applied on fuels for goods and services</li> <li>- May not raise environmental awareness – people may just carry on as usual</li> </ul>                       |

#### Supplementary Materials References

- [1] Al-Guthmy FMO, Yan W. Mind the gap: personal carbon trading for road transport in Kenya. *Climate Policy* 2020;20:1141–60.
- [2] Uusitalo V, Huttunen A. *Motivating Citizens To Reduce Their Mobility Emissions Through Personal Carbon Trading*. Lahti: 2021.
- [3] Lane C, Harris R, Roberts S. An analysis of the technical feasibility and potential cost of a personal carbon trading scheme. Department for Environment, Food and Rural Affairs. Department for Environment, Food and Rural Affairs 2008:47.
- [4] Fleming D, Chamberlin S. *TEQs Tradable Energy Quotas A Policy Framework for Peak Oil and Climate Change*. London: 2011.
- [5] Vanclay JK, Shortiss J, Aulsebrook S, Gillespie AM, Howell BC, Johanni R, et al. Customer Response to Carbon Labelling of Groceries. *Journal of Consumer Policy* 2011;34:153–60.
- [6] Elkins P, Baker T. Carbon Taxes and Carbon Emissions Trading. *Journal of Economic Surveys* 2002;15:325–76.
- [7] Sumner J, Bird L, Dobos H. Carbon taxes: A review of experience and policy design considerations. *Climate Policy* 2011;11:922–43.
